# Supplementary material
Source: Springer Nature journal article supplement (https://www.springermedizin.de/resource/supplementary/12935_2010_260_MOESM4_ESM.pdf/9540166)

Cumulative Survival Rate

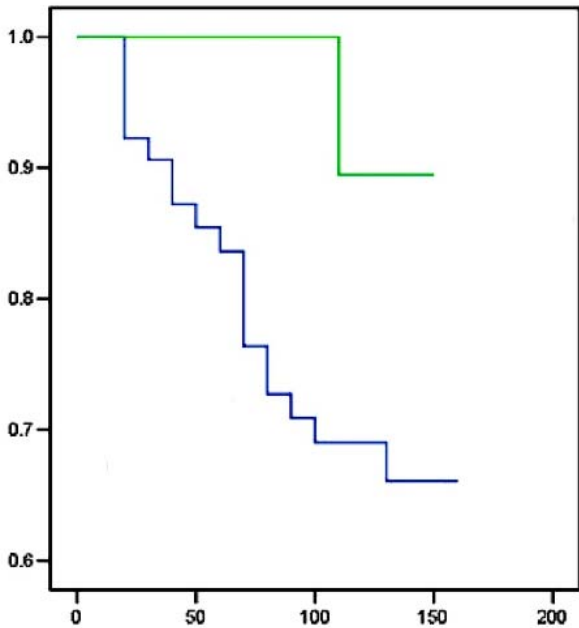

— = low transcript level

— = high transcript level

Survival Time (Months)

Supplement: MOESM4 [file 9540166]
